# Supplementary material
Source: PubMed Central journal article supplement (PMC4959158)
Supplement: AEM.00860-16_zam999117184so1.pdf [file AEM.00860-16_zam999117184so1.pdf]

## **Supplemental Material**

### **Origin of chemical diversity in the *Prochloron*-tunicate symbiosis**

Zhenjian Lin, Joshua P. Torres, Ma. Diarey Tianero, Jason C. Kwan, and Eric W. Schmidt\*

Department of Medicinal Chemistry, University of Utah, Salt Lake City, UT 84112, USA

\*ews1@utah.edu

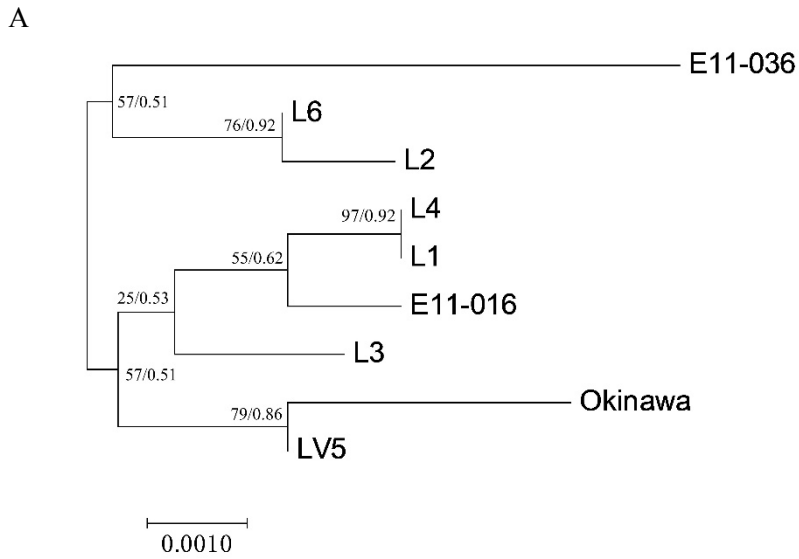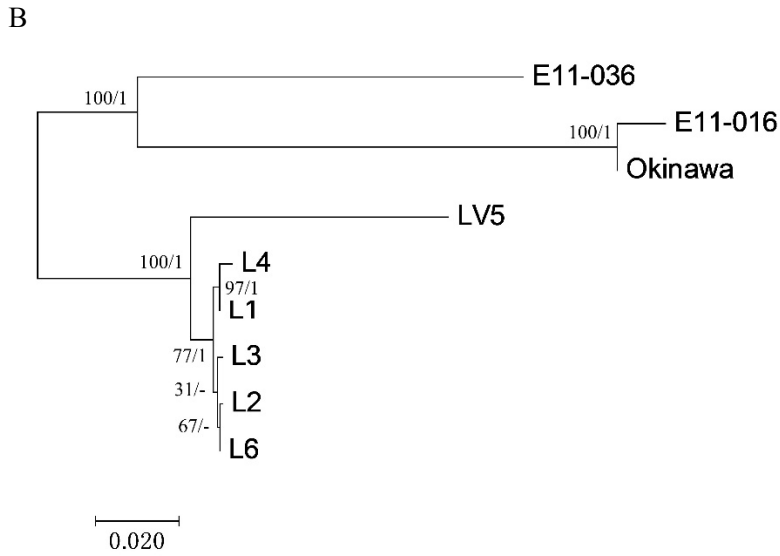

**Figure S1. Comparison of 16srRNA gene tree with the 18S tree topology.** The maximum likelihood (ML) tree from MEGA 7.0 analysis of the (A) 16S rRNA nucleotide sequences of *Prochloron* and (B) 18S rRNA nucleotide sequences of tunicates. Maximum likelihood (ML) bootstrap values and Bayesian clade credibility values are indicated at the nodes (bootstrap values/clade credibility values).

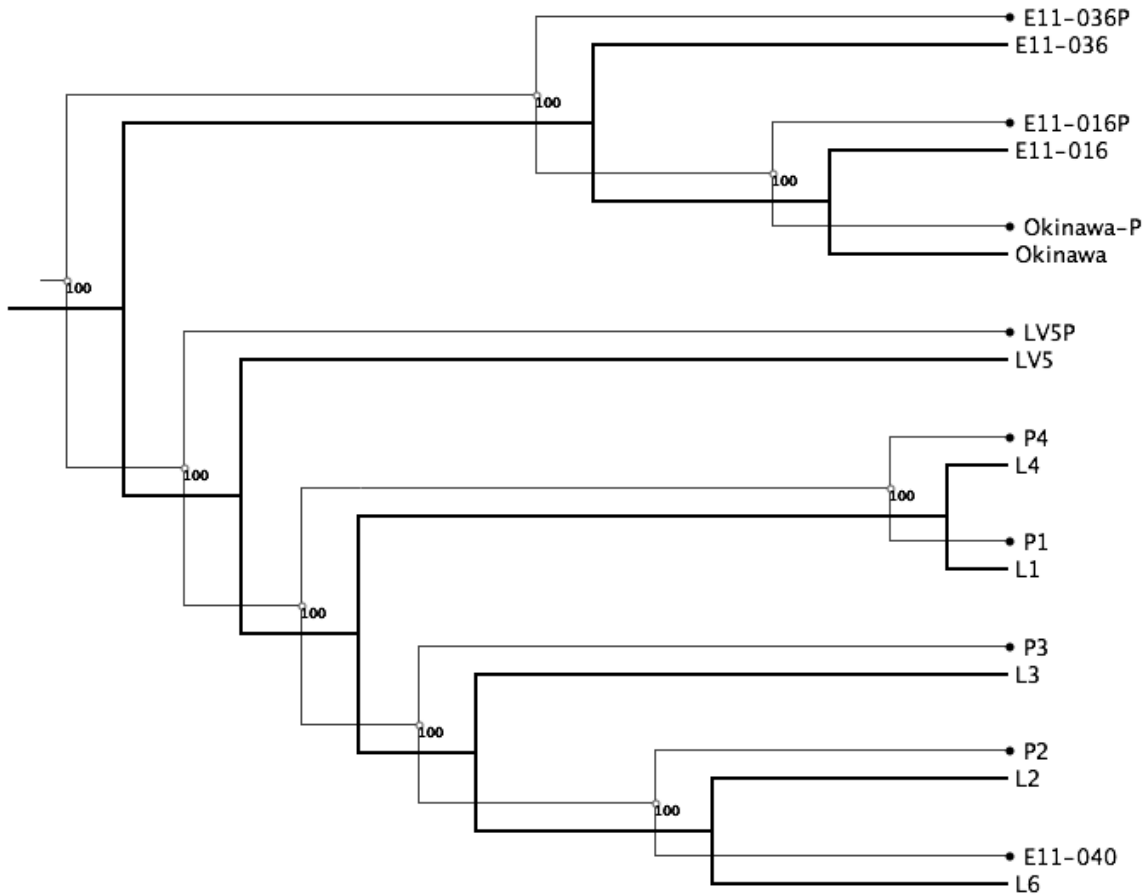

**Fig S2. Reconciliation between *Prochloron* and tunicate phylogenies.** One of 63 solutions, all of which show eight cospeciations and no duplications, host switches, or losses (total cost = 0). Reconciliation of *Prochloron* and host trees was generated with Jane v.4. Black and bold black lines represent *Prochloron* and their tunicate hosts, respectively. Empty circles represent cospeciations; supporting value was labeled at each node. (The *Prochloron* tree was generated from the concatenation of the 1851 conserved genes and the tunicate tree was generated from 18s rRNA gene. P1-P4, E11-040, E11-036P, E11-016P and Okinawa-P are the *Prochlorons* corresponding to their hosts)

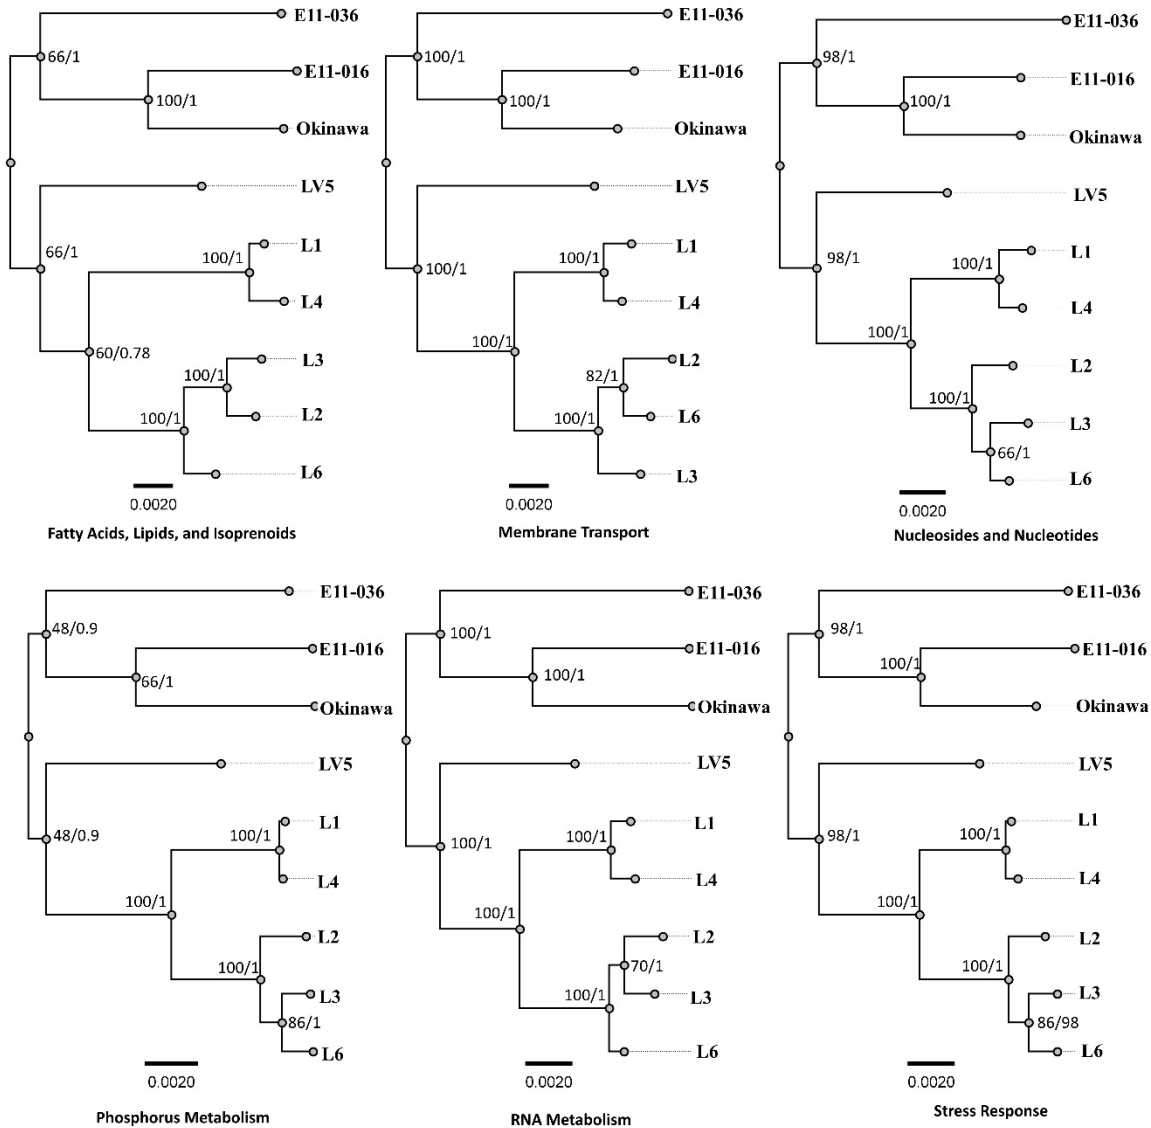

**Fig S3. The maximum likelihood (ML) trees derived from individual functional categories of genes showed similar topology to 18s rRNA tree in FigS1. Maximum likelihood (ML) bootstrap values and Bayesian clade credibility values are indicated at the nodes (bootstrap values/clade credibility values).**

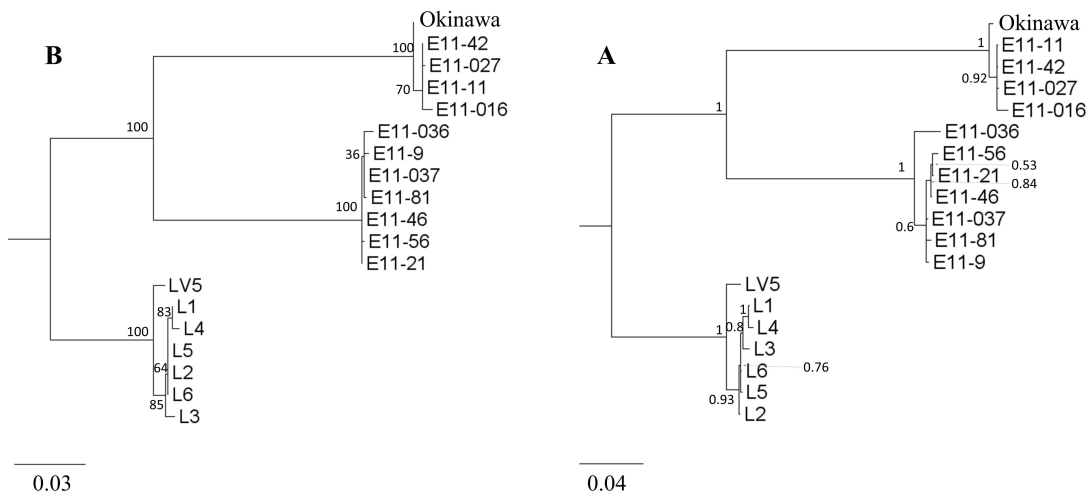

**Fig S4. Phylogenetic trees from (A) Maximum Likelihood analysis (by MEGA 7.0) and (B) Bayesian analysis (by Mrbayes) of 18s rRNA gene.** Maximum likelihood (ML) bootstrap values and Bayesian clade credibility values are indicated at the nodes.

**Table S1. Collection location (coordinates) for each sample.**

|                                  |                          |
|----------------------------------|--------------------------|
| 07°15', 134°15'                  | L1                       |
| -17°55', 177°16'                 | L2                       |
| -08°57'21.0000", 159°15'41.4000" | L3                       |
| -04°45'36.0600", 151°25'19.2000" | L4                       |
| -10°16'07.9248", 145°38'45.4128" | L6, E11-036, L5, E11-037 |
| -04°07'60.0000", 151°34'00.0000" | LV5                      |
| -10°10'12.6077", 145°42'53.8812" | E11-021                  |
| -10°10'34.8744", 145°33'13.1904" | E11-046, E11-042         |
| -10°02'13.4826", 145°46'03.8676" | E11-09, E11-011, E11-016 |
| -10°11'56.4015", 145°38'31.4016" | E11-027                  |
| -10°02'36.3552", 145°33'23.1480" | E11-056                  |
| -10°00'21.3372", 145°43'59.6352" | E11-081                  |
| Hateruma Island, Okinawa         | Okinawa                  |

**Table S2. Metagenome data obtained in this study (blue) and in previous studies (gray).**

| host tunicate | sample collection | metagenome sequencing | metagenome assembly | metagenome binning | <i>Prochloron</i> genome identification | <i>Prochloron</i> genome annotation |
|---------------|-------------------|-----------------------|---------------------|--------------------|-----------------------------------------|-------------------------------------|
| L1            |                   |                       |                     |                    |                                         |                                     |
| L2            |                   |                       |                     |                    |                                         |                                     |
| L3            |                   |                       |                     |                    |                                         |                                     |
| L4            |                   |                       |                     |                    |                                         |                                     |
| L5            |                   |                       |                     |                    |                                         |                                     |
| L6            |                   |                       |                     |                    |                                         |                                     |
| LV5           |                   |                       |                     |                    |                                         |                                     |
| E11-036       |                   |                       |                     |                    |                                         |                                     |
| E11-037       |                   |                       |                     |                    |                                         |                                     |
| E11-016       |                   |                       |                     |                    |                                         |                                     |
| Okinawa       |                   |                       |                     |                    |                                         |                                     |

**Table S3. Metagenome sequencing and assembly information.**

| sample  | Illumina libraries | sequencer                     | sequencing runs   | sequencing depth reads | <i>Prochloron</i> reads | assemble program | total length of contigs | number of contigs | N50 stats | GC % |
|---------|--------------------|-------------------------------|-------------------|------------------------|-------------------------|------------------|-------------------------|-------------------|-----------|------|
| L5      | 350 bps            | Illumina HiSeq 2000 sequencer | 101 bp paired-end | 244718082              | NA                      | IDBA_ud          | 685252988               | 253830            | 6939      | 32.1 |
| L6      | 350 bps            | Illumina HiSeq 2000           | 101 bp paired-end | 347679462              | 2797494                 | IDBA_ud          | 712541213               | 241649            | 10445     | 31.9 |
| LV5     | 400 bps            | Illumina HiSeq 2000           | 101 bp paired-end | 629369536              | 13607781                | IDBA_ud          | 756714778               | 380574            | 5973      | 32.8 |
| E11-036 | 350 bps            | Illumina MiSeq                | 251 bp paired-end | 17849726               | 249387                  | IDBA_ud          | 716585695               | 490682            | 3303      | 34.9 |
| E11-037 | 350 bps            | Illumina HiSeq 2000           | 101 bp paired-end | 369180626              | NA                      | IDBA_ud          | 944670545               | 473951            | 6648      | 35.5 |
| E11-016 | 280/800bps         | Illumina HiSeq 2000           | 125 bp paired-end | 174618110              | 8443432                 | IDBA_ud          | 957775449               | 944402            | 2460      | 34.1 |
| Okinawa | 350 bps            | Illumina HiSeq 2000           | 125 bp paired-end | 190421681              | 3657600                 | IDBA_ud          | 932843649               | 607266            | 3155      | 33.9 |

**Table S4. Primers used in this study.**

| Primer Name  | Sequence                  |
|--------------|---------------------------|
| AscF2new     | CAAGGAAGGCAGCAGGCGCGCAAAT |
| AscR5New     | GCGGTGTGTACAAAGGGCAGGGA   |
| DiplosomaF   | GCGTTCGAAGCAGTCTTG        |
| DiplosomaR   | GATCGCCTTTTCGTTCGGA       |
| LissoclinumF | TAACGACACTGCGAAAGGC       |
| LissoclinumR | GCTCGATCCCCGAAGGAC        |
| DidemnumF    | GTCTACGTGGTTCGTGCGGCGACG  |
| DidemnumR    | TTCACGAGCCTCTCGGCCCGC     |
| 201_Fwd      | ATGAAAAGATTGGTGAGCGTA     |
| 201_Rev      | TTAGTAAACGCCAATATTAAAGC   |

**Table S5. Branch lengths comparison of maximum likelihood (ML) tree derived from 1,851 conserved *Prochloron* genes (comparison tree) and 18S rRNA gene sequences (reference tree) from the same samples.**

| <b>Brl_ref_tree</b> | <b>Brl_comp_tree</b> | <b>Brl_comp_tree_K</b> | <b>Partition</b>                                              |
|---------------------|----------------------|------------------------|---------------------------------------------------------------|
| 0.03032             | 0.00127              | 0.00668                | (E11-036, Okinawa, E11-016) / (LV5, L4, L1, L3, L2, L6, root) |
| 0.11493             | 0.00424              | 0.02221                | (Okinawa, E11-016) / (E11-036, LV5, L4, L1, L3, L2, L6, root) |
| 0.03032             | 0.00127              | 0.00668                | (LV5, L4, L1, L3, L2, L6) / (E11-036, Okinawa, E11-016, root) |
| 0.00546             | 0.00363              | 0.01906                | (L4, L1, L3, L2, L6) / (E11-036, Okinawa, E11-016, LV5, root) |
| 0.00154             | 0.00501              | 0.02626                | (L4, L1) / (E11-036, Okinawa, E11-016, LV5, L3, L2, L6, root) |
| 0.00094             | 0.00408              | 0.02142                | (L3, L2, L6) / (E11-036, Okinawa, E11-016, LV5, L4, L1, root) |
| 0.00064             | 0.00131              | 0.00689                | (L2, L6) / (E11-036, Okinawa, E11-016, LV5, L4, L1, L3, root) |
| 0.09245             | 0.01324              | 0.06945                | (E11-036) / (Okinawa, E11-016, LV5, L4, L1, L3, L2, L6, root) |
| 0                   | 0.00741              | 0.03888                | (Okinawa) / (E11-036, E11-016, LV5, L4, L1, L3, L2, L6, root) |
| 0.01159             | 0.00712              | 0.03735                | (E11-016) / (E11-036, Okinawa, LV5, L4, L1, L3, L2, L6, root) |
| 0.06176             | 0.00815              | 0.04273                | (LV5) / (E11-036, Okinawa, E11-016, L4, L1, L3, L2, L6, root) |
| 0.00304             | 0.00149              | 0.00779                | (L4) / (E11-036, Okinawa, E11-016, LV5, L1, L3, L2, L6, root) |
| 0                   | 0.00114              | 0.00596                | (L1) / (E11-036, Okinawa, E11-016, LV5, L4, L3, L2, L6, root) |
| 0.00118             | 0.00215              | 0.01129                | (L3) / (E11-036, Okinawa, E11-016, LV5, L4, L1, L2, L6, root) |
| 0.00061             | 0.00342              | 0.01794                | (L2) / (E11-036, Okinawa, E11-016, LV5, L4, L1, L3, L6, root) |
| 0                   | 0.00393              | 0.02061                | (L6) / (E11-036, Okinawa, E11-016, LV5, L4, L1, L3, L2, root) |

**Brl\_ref\_tree:** Branch length of this partition on the reference tree.

**Brl\_comp\_tree:** Branch length of this partition on the original comparison tree.

**Brl\_comp\_tree\_K:** Branch length of this partition on the comparison tree after scaling.

**Partition:** Tip nodes that constitute this partition.



**Table S6. Topology comparison of maximum likelihood (ML) tree derived with 18S rRNA gene sequences (reference tree) from the same samples.**

| Trees                                | K-score | Scale_fac | Symm_dif | N_partitions<br>ref_tree | N_partitions<br>comp_tree |
|--------------------------------------|---------|-----------|----------|--------------------------|---------------------------|
| concatenated-1851 genes              | 0.12215 | 5.24499   | 0        | 16                       | 16                        |
| Fatty Acids, Lipids, and Isoprenoids | 0.11996 | 5.35526   | 2        | 16                       | 16                        |
| Membrane Transport                   | 0.11633 | 5.85165   | 0        | 16                       | 16                        |
| Nucleosides and Nucleotides          | 0.11403 | 7.43616   | 2        | 16                       | 16                        |
| Phosphorus Metabolism                | 0.12765 | 6.34812   | 2        | 16                       | 16                        |
| RNA Metabolism                       | 0.12089 | 6.59201   | 2        | 16                       | 16                        |
| stress response                      | 0.11418 | 6.98805   | 2        | 16                       | 16                        |

**K-score:** the minimum branch length distance

**Scale\_fac:** scale factor

**Symm\_dif:** symmetric difference (Robinson-Foulds)

**N\_partitions\_ref\_tree:** number of partitions of reference tree

**N\_partitions\_comp\_tree:** number of partitions of comparison tree

## Source code

```
1.fasta_extract_mult.pl
#!/usr/bin/perl -w
# fasta_extract_mult.pl - a program that will extract sequences from a
# multifasta file given the sequence headers (without leading ">")
# USAGE fasta_extract_mult.pl --in <input_fasta> --seqs <seq_names>
#                                     --out <output_fasta>
use strict;
use warnings;
use Getopt::Long;
my ($input_fasta, $seq_names, $output_fasta);
GetOptions (
    'in=s'      => \$input_fasta,
    'seqs=s'    => \$seq_names,
    'out=s'     => \$output_fasta,
);
my ($header, $sequence, $switch, %seq_hash);
open (my $seq_names_fh, "<", $seq_names) or die "Can't open $seq_names\n";
while (my $line = <$seq_names_fh> ) {
    chomp($line);
    $seq_hash{"\>$line"} = 1;
}
close $seq_names_fh;
open (my $input_fasta_fh, "<", $input_fasta) or die "Can't open $input_fasta\n";
open (my $output_fasta_fh, ">", $output_fasta);
while (my $line = <$input_fasta_fh> ) {
    chomp $line;
    if ($line =~ /^>/) {
        print_wrap($header, $sequence);
        ($header, $sequence) = ($line, "");
    }
}
```

```

    }
    else {
        $sequence .= "$line";
    }
    if (eof($input_fasta_fh)) {
        print_wrap($header, $sequence);
    }
}

sub print_wrap {
    my ($header, $sequence) = @_;
    return unless (defined($header) && defined($seq_hash{$header}));
    if ($seq_hash{$header} == 1) {
        print $output_fasta_fh "$header\n";
        foreach (split(/(.{60}.+?)\s/, $sequence)) {
            print $output_fasta_fh "$_\n" if $_ ne "";
        }
    }
}

```

## 2. proteome\_comparison.sh

```
#!/bin/bash
```

```
blastp -query combin.faa -num_threads 128 -max_target_seqs 1 -best_hit_overhang 0.1 -
best_hit_score_edge 0.1 -outfmt "6 qseqid sseqid pident length evalue qcovs qlen slen" -
db ../db/P1 -out combin_blast_P1
```

```
wait
```

```
awk ' $3>80 i&& $4/$8>0.8 && $6>80 { print $1 }' combin_blast_P1 > hit
```

```
perl ~/scripts/jason/delete_seqs_from_fasta.pl P2-1215.24.faa hit P2-1.faa
```

```
perl ~/scripts/jason/delete_seqs_from_fasta.pl P3-1215.23.faa hit P3-1.faa
```

```
perl ~/scripts/jason/delete_seqs_from_fasta.pl P4-1215.25.faa hit P4-1.faa
```

```
perl ~/scripts/jason/delete_seqs_from_fasta.pl E11-016-1117.47.faa hit E11-016-1.faa
```

```
perl ~/scripts/jason/delete_seqs_from_fasta.pl E11-036-1215.20.faa hit E11-036-1.faa
```

```
perl ~/scripts/jason/delete_seqs_from_fasta.pl E11-040-1117.26.faa hit E11-040-1.faa
perl ~/scripts/jason/delete_seqs_from_fasta.pl diplosoma-1117.55.faa hit diplosoma-1.faa
perl ~/scripts/jason/delete_seqs_from_fasta.pl LV5-1117.56.faa hit LV5-1.faa
```

```
cat P3-1.faa P4-1.faa E11-016-1.faa E11-036-1.faa E11-040-1.faa LV5-1.faa diplosoma-1.faa >
combin-1.faa
```

```
makeblastdb -in P2-1.faa -dbtype 'prot' -out db/P2-1
```

```
blastp -query combin-1.faa -num_threads 128 -max_target_seqs 1 -best_hit_overhang 0.1 -
best_hit_score_edge 0.1 -outfmt "6 qseqid sseqid pident length evalue qcovs qlen slen" -db
db/P2-1 -out combin-1_blast_P2-1
```

```
awk ' $3>80 i&& $4/$8>0.8 && $6>80 { print $1 }' combin-1_blast_P2-1 > hit1
```

```
perl ~/scripts/jason/delete_seqs_from_fasta.pl P3-1.faa hit1 P3-2.faa
```

```
perl ~/scripts/jason/delete_seqs_from_fasta.pl P4-1.faa hit1 P4-2.faa
```

```
perl ~/scripts/jason/delete_seqs_from_fasta.pl E11-016-1.faa hit1 E11-016-2.faa
```

```
perl ~/scripts/jason/delete_seqs_from_fasta.pl E11-036-1.faa hit1 E11-036-2.faa
```

```
perl ~/scripts/jason/delete_seqs_from_fasta.pl E11-040-1.faa hit1 E11-040-2.faa
```

```
perl ~/scripts/jason/delete_seqs_from_fasta.pl diplosoma-1.faa hit1 diplosoma-2.faa
```

```
perl ~/scripts/jason/delete_seqs_from_fasta.pl LV5-1.faa hit1 LV5-2.faa
```

```
cat P4-2.faa E11-016-2.faa E11-036-2.faa E11-040-2.faa LV5-2.faa diplosoma-2.faa > combin-
2.faa
```

```
makeblastdb -in P3-2.faa -dbtype 'prot' -out db/P3-2
```

```
blastp -query combin-2.faa -num_threads 128 -max_target_seqs 1 -best_hit_overhang 0.1 -
best_hit_score_edge 0.1 -outfmt "6 qseqid sseqid pident length evalue qcovs qlen slen" -db
db/P3-2 -out combin-2_blast_P3-2
```

```
awk ' $3>80 i&& $4/$8>0.8 && $6>80 { print $1 }' combin-2_blast_P3-2 > hit2
```

```
perl ~/scripts/jason/delete_seqs_from_fasta.pl P4-2.faa hit2 P4-3.faa
```

```
perl ~/scripts/jason/delete_seqs_from_fasta.pl E11-016-2.faa hit2 E11-016-3.faa
```

```
perl ~/scripts/jason/delete_seqs_from_fasta.pl E11-036-2.faa hit2 E11-036-3.faa
```

```
perl ~/scripts/jason/delete_seqs_from_fasta.pl E11-040-2.faa hit2 E11-040-3.faa
```

```
perl ~/scripts/jason/delete_seqs_from_fasta.pl diplosoma-2.faa hit2 diplosoma-3.faa
```

```
perl ~/scripts/jason/delete_seqs_from_fasta.pl LV5-2.faa hit2 LV5-3.faa
cat E11-016-3.faa E11-036-3.faa E11-040-3.faa LV5-3.faa diplosoma-3.faa > combin-3.faa
makeblastdb -in P4-3.faa -dbtype 'prot' -out db/P4-3
blastp -query combin-3.faa -num_threads 128 -max_target_seqs 1 -best_hit_overhang 0.1 -
best_hit_score_edge 0.1 -outfmt "6 qseqid sseqid pident length evalue qcovs qlen slen" -db
db/P4-3 -out combin-3_blast_P4-3
awk ' $3>80 i&& $4/$8>0.8 && $6>80 { print $1 }' combin-3_blast_P4-3 > hit3
perl ~/scripts/jason/delete_seqs_from_fasta.pl E11-016-3.faa hit3 E11-016-4.faa
perl ~/scripts/jason/delete_seqs_from_fasta.pl E11-036-3.faa hit3 E11-036-4.faa
perl ~/scripts/jason/delete_seqs_from_fasta.pl E11-040-3.faa hit3 E11-040-4.faa
perl ~/scripts/jason/delete_seqs_from_fasta.pl diplosoma-3.faa hit3 diplosoma-4.faa
perl ~/scripts/jason/delete_seqs_from_fasta.pl LV5-3.faa hit3 LV5-4.faa
cat E11-036-4.faa E11-040-4.faa LV5-4.faa diplosoma-4.faa > combin-4.faa
makeblastdb -in E11-016-4.faa -dbtype 'prot' -out db/E11-016-4
blastp -query combin-4.faa -num_threads 128 -max_target_seqs 1 -best_hit_overhang 0.1 -
best_hit_score_edge 0.1 -outfmt "6 qseqid sseqid pident length evalue qcovs qlen slen" -db
db/E11-016-4 -out combin-4_blast_E11-016-4
awk ' $3>80 i&& $4/$8>0.8 && $6>80 { print $1 }' combin-4_blast_E11-016-4 > hit4
perl ~/scripts/jason/delete_seqs_from_fasta.pl E11-036-4.faa hit4 E11-036-5.faa
perl ~/scripts/jason/delete_seqs_from_fasta.pl E11-040-4.faa hit4 E11-040-5.faa
perl ~/scripts/jason/delete_seqs_from_fasta.pl diplosoma-4.faa hit4 diplosoma-5.faa
perl ~/scripts/jason/delete_seqs_from_fasta.pl LV5-4.faa hit4 LV5-5.faa
cat E11-040-5.faa LV5-5.faa diplosoma-5.faa > combin-5.faa
makeblastdb -in E11-036-5.faa -dbtype 'prot' -out db/E11-036-5
blastp -query combin-5.faa -num_threads 128 -max_target_seqs 1 -best_hit_overhang 0.1 -
best_hit_score_edge 0.1 -outfmt "6 qseqid sseqid pident length evalue qcovs qlen slen" -db
db/E11-036-5 -out combin-5_blast_E11-036-5
awk ' $3>80 i&& $4/$8>0.8 && $6>80 { print $1 }' combin-5_blast_E11-036-5 > hit5
perl ~/scripts/jason/delete_seqs_from_fasta.pl E11-040-5.faa hit5 E11-040-6.faa
perl ~/scripts/jason/delete_seqs_from_fasta.pl diplosoma-5.faa hit5 diplosoma-6.faa
perl ~/scripts/jason/delete_seqs_from_fasta.pl LV5-5.faa hit5 LV5-6.faa
```

```
cat diplosoma-6.faa LV5-6.faa > combin-6.faa
```

```
makeblastdb -in E11-040-6.faa -dbtype 'prot' -out db/E11-040-6
```

```
blastp -query combin-6.faa -num_threads 128 -max_target_seqs 1 -best_hit_overhang 0.1 -  
best_hit_score_edge 0.1 -outfmt "6 qseqid sseqid pident length evalue qcovs qlen slen" -db  
db/E11-040-6 -out combin-6_blast_E11-040-6
```

```
awk ' $3>80 i&& $4/$8>0.8 && $6>80 { print $1 }' combin-6_blast_E11-040-6 > hit6
```

```
perl ~/scripts/jason/delete_seqs_from_fasta.pl diplosoma-6.faa hit6 diplosoma-7.faa
```

```
perl ~/scripts/jason/delete_seqs_from_fasta.pl LV5-6.faa hit6 LV5-7.faa
```

```
cat LV5-7.faa > combin-7.faa
```

```
makeblastdb -in diplosoma-7.faa -dbtype 'prot' -out db/diplosoma-7
```

```
blastp -query combin-7.faa -num_threads 128 -max_target_seqs 1 -best_hit_overhang 0.1 -  
best_hit_score_edge 0.1 -outfmt "6 qseqid sseqid pident length evalue qcovs qlen slen" -db  
db/diplosoma-7 -out combin-7_blast_diplosoma-7
```

```
awk ' $3>80 i&& $4/$8>0.8 && $6>80 { print $1 }' combin-7_blast_diplosoma-7 > hit7
```

```
perl ~/scripts/jason/delete_seqs_from_fasta.pl LV5-7.faa hit7 LV5-8.faa
```

```
cat P1-1117.48.faa P2-1.faa P3-2.faa P4-3.faa E11-016-4.faa E11-036-5.faa E11-040-6.faa  
diplosoma-7.faa LV5-8.faa > all-unique.faa
```

```
makeblastdb -in all-unique.faa -dbtype 'prot' -out db/all-unique
```

```
#####
```

```
wait
```

```
blastp -query P1-1117.48.faa -num_threads 128 -max_target_seqs 1 -best_hit_overhang 0.1 -  
best_hit_score_edge 0.1 -outfmt "6 qseqid sseqid pident length evalue qcovs qlen slen" -db  
db/all-unique -out blast_unique/P1_blast_all_unique
```

```
blastp -query P2-1215.24.faa -num_threads 128 -max_target_seqs 1 -best_hit_overhang 0.1 -  
best_hit_score_edge 0.1 -outfmt "6 qseqid sseqid pident length evalue qcovs qlen slen" -db  
db/all-unique -out blast_unique/P2_blast_all_unique
```

```
blastp -num_threads 128 -max_target_seqs 1 -best_hit_overhang 0.1 -best_hit_score_edge 0.1 -  
outfmt "6 qseqid sseqid pident length evalue qcovs qlen slen" -db db/all-unique -query P3-  
1215.23.faa -out blast_unique/P3_blast_all_unique
```

```
blastp -num_threads 128 -max_target_seqs 1 -best_hit_overhang 0.1 -best_hit_score_edge 0.1 -  
outfmt "6 qseqid sseqid pident length evalue qcovs qlen slen" -db db/all-unique -query P4-  
1215.25.faa -out blast_unique/P4_blast_all_unique
```

```

blastp -num_threads 128 -max_target_seqs 1 -best_hit_overhang 0.1 -best_hit_score_edge 0.1 -
outfmt "6 qseqid sseqid pident length evalue qcovs qlen slen" -db db/all-unique -query E11-016-
1117.47.faa -out blast_unique/E11-016_blast_all_unique
blastp -num_threads 128 -max_target_seqs 1 -best_hit_overhang 0.1 -best_hit_score_edge 0.1 -
outfmt "6 qseqid sseqid pident length evalue qcovs qlen slen" -db db/all-unique -query E11-036-
1215.20.faa -out blast_unique/E11-036_blast_all_unique
blastp -num_threads 128 -max_target_seqs 1 -best_hit_overhang 0.1 -best_hit_score_edge 0.1 -
outfmt "6 qseqid sseqid pident length evalue qcovs qlen slen" -db db/all-unique -query E11-040-
1117.26.faa -out blast_unique/E11-040_blast_all_unique
blastp -num_threads 128 -max_target_seqs 1 -best_hit_overhang 0.1 -best_hit_score_edge 0.1 -
outfmt "6 qseqid sseqid pident length evalue qcovs qlen slen" -db db/all-unique -query
diplosoma-1117.55.faa -out blast_unique/diplosoma_blast_all_unique
blastp -num_threads 128 -max_target_seqs 1 -best_hit_overhang 0.1 -best_hit_score_edge 0.1 -
outfmt "6 qseqid sseqid pident length evalue qcovs qlen slen" -db db/all-unique -query LV5-
1117.56.faa -out blast_unique/LV5_blast_all_unique

```

wait

```

awk ' $3>80 && $4/$8>0.8 && $6>80 { print $2 } ' diplosoma_blast_all_unique >
diplosoma_hits
awk ' $3>80 && $4/$8>0.8 && $6>80 { print $2 } ' E11-016_blast_all_unique > E11-016_hits
awk ' $3>80 && $4/$8>0.8 && $6>80 { print $2 } ' E11-036_blast_all_unique > E11-036_hits
awk ' $3>80 && $4/$8>0.8 && $6>80 { print $2 } ' E11-040_blast_all_unique > E11-040_hits
awk ' $3>80 && $4/$8>0.8 && $6>80 { print $2 } ' P1_blast_all_unique > P1_hits
awk ' $3>80 && $4/$8>0.8 && $6>80 { print $2 } ' P2_blast_all_unique > P2_hits
awk ' $3>80 && $4/$8>0.8 && $6>80 { print $2 } ' P3_blast_all_unique > P3_hits
awk ' $3>80 && $4/$8>0.8 && $6>80 { print $2 } ' P4_blast_all_unique > P4_hits
awk ' $3>80 && $4/$8>0.8 && $6>80 { print $2 } ' LV5_blast_all_unique > LV5_hits

```

### 3. delete\_seqs\_from\_fasta.pl

```
#!/usr/bin/perl
```

```

# Program to delete sequences from a fasta, when given a list of sequences to delete.
# Especially for large Illumina-derived fastas (e.g. /1 or /2 at end of seqs).
# USAGE delete_seqs_from_fasta.pl source.fasta seqs.list output.fasta

```

```

use strict;
use warnings;

```

```

unless (defined $ARGV[2])
{
    print "\nNot enough arguments\n";
    exit 1;
}

```

```

unless (-e $ARGV[0])
{
    print "\nCouldn't find source .qual file\n";
    exit 1;
}

```

```

unless (-e $ARGV[1])
{
    print "\nCouldn't find list file\n";
    exit 1;
}

my $inputfile = $ARGV[0];
my $inputlist = $ARGV[1];
my $outputfile = $ARGV[2];

# make a hash of sequence names
my %seqs;

open (INPUTLIST, "<$inputlist");
while (<INPUTLIST>)
{
    chomp $_;
    $seqs{ $_ } = 1;
}
close INPUTLIST;

# Parse through fasta file, keeping the lines that belong to the correct sequences
open (INPUTFILE, "<$inputfile");
open (OUTPUTFILE, ">$outputfile");

my $in_sequence = 0; # Boolean to see if we are within a sequence of interest
while (<INPUTFILE>)
{
    my $line = $_;
    my @linearray = split (" ", $line);

    if ($linearray[0] =~ m{>}) # The current line is a sequence header
    {
        my $seq_temp = substr ($linearray[0], 1);
        my @seq_array = split (/\/, $seq_temp); # for Illumina paired end files
        my $seq_name = $seq_array[0];

        unless (defined $seqs{$seq_name}) # then we want to keep this sequence
        {
            print OUTPUTFILE $line;
            $in_sequence = 1;
        }
        else # We don't want to keep this sequence
        {
            $in_sequence = 0;
        }
    }
    else
    {
        if ($in_sequence == 1) # we are within a sequence we want to keep
        {

```



```
        print OUTPUTFILE $line;
    }
}

close INPUTFILE;
close OUTPUTFILE;
```
